# Supplementary material for: Clinical Features and Multiplatform Molecular Analysis Assist in Understanding Patient Response to Anti-PD-1/PD-L1 in Renal Cell Carcinoma
Source: MDPI journal article supplement (doi:10.3390/cancers13061475), 2021-03-23
Supplement: s1 [file s1]

Figure S1

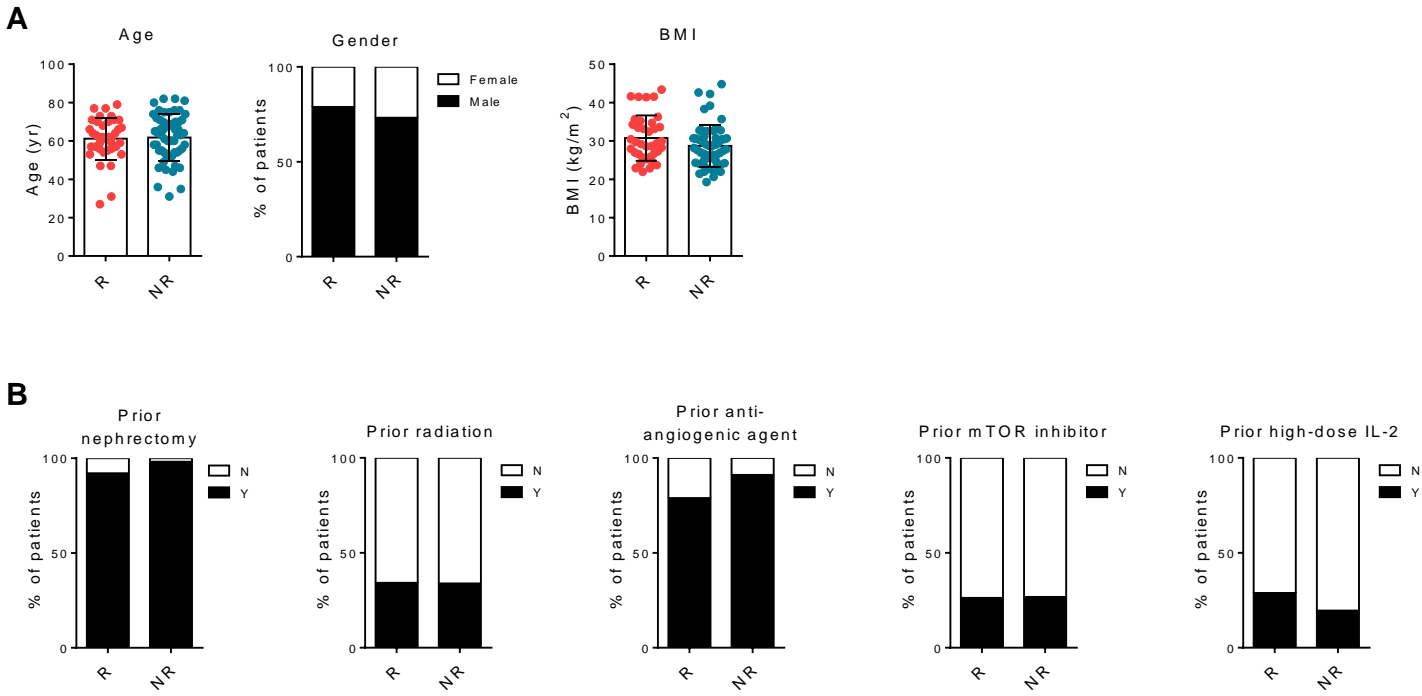

Figure S2

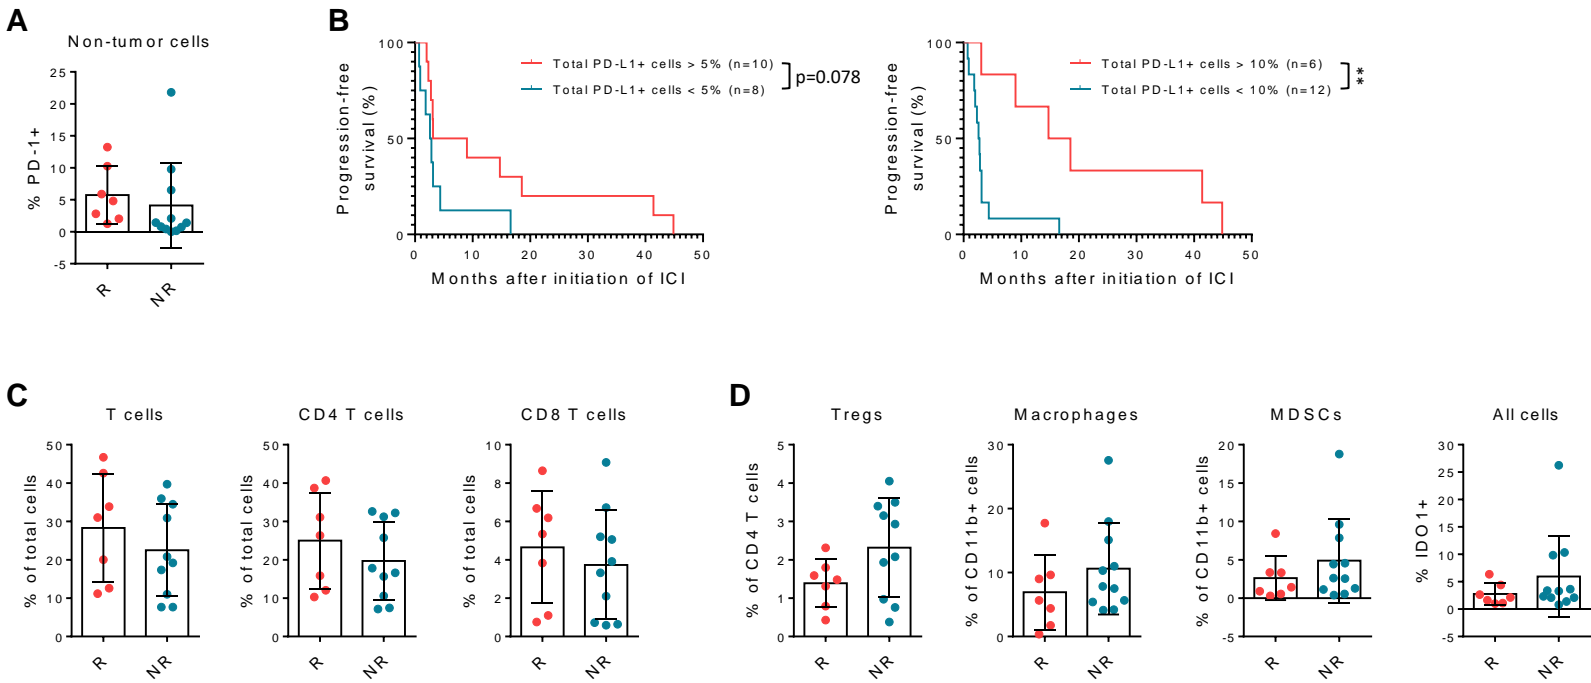

Figure S3

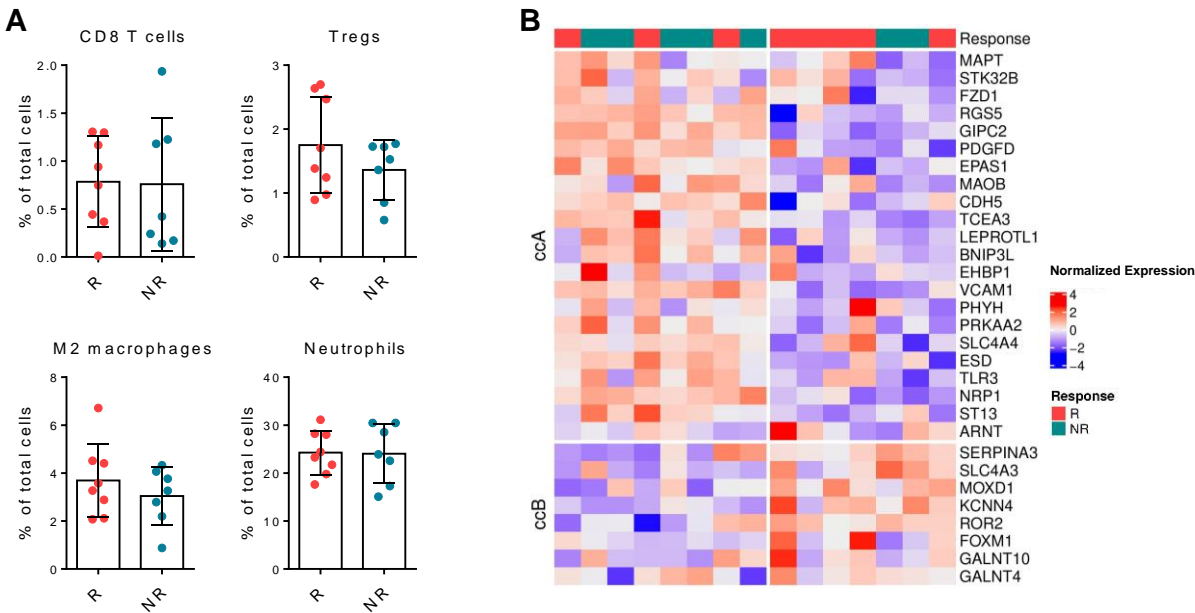

**Table S1.** Antibody panels used in multiplexed immunofluorescence assay

| Panel                      | Antibody        | Clone   | Secondary            | Fluorophore |
|----------------------------|-----------------|---------|----------------------|-------------|
| PD-1/PD-L1/CK              | PD-1            | NAT105  | Mouse EnVision+ HRP  | TSA+Cy3.5   |
|                            | PD-L1           | E1L3N   | Rabbit EnVision+ HRP | TSA+Cy5     |
| CD11b/HLA-DR/IDO-1/CK      | CD11b           | EP1345Y | Rabbit EnVision+ HRP | Opal520     |
|                            | HLA-DR          | TAL.1B5 | Mouse EnVision+ HRP  | TSA+Cy3     |
|                            | IDO-1           | SP260   | Rabbit EnVision+ HRP | TSA+Cy5     |
|                            | Pan-Cytokeratin | AE1/AE3 | N/A                  | Alexa488    |
| CD4/CD8/CD25/FoxP3/Ki67/CK | CD4             | 4B12    | Mouse EnVision+ HRP  | Opal520     |
|                            | CD8             | C8/144B | Mouse EnVision+ HRP  | Opal620     |
|                            | CD25            | SP176   | Rabbit EnVision+ HRP | Opal570     |
|                            | FoxP3           | D2W8E   | Rabbit EnVision+ HRP | Opal540     |
|                            | Ki67            | MIB-1   | Mouse EnVision+ HRP  | Opal650     |
|                            | Pan-Cytokeratin | AE1/AE3 | Mouse EnVision+ HRP  | Opal690     |

**Table S2.** Clinical characteristics of biomarker cohort of patients with RCC

|                                                     | Biomarker cohort, N = 26 | Responders (CR, PR, mixed), N = 13 | Non-responders (PD), N = 13 |
|-----------------------------------------------------|--------------------------|------------------------------------|-----------------------------|
| <b>Best response to ICI therapy (%)</b>             |                          |                                    |                             |
| CR                                                  | 1 (3.8)                  | 1 (7.7)                            | 0 (0.0)                     |
| PR                                                  | 10 (38.5)                | 11 (76.9)                          | 0 (0.0)                     |
| PD                                                  | 13 (50.0)                | 0 (0.0)                            | 13 (100.0)                  |
| Mixed                                               | 2 (7.7)                  | 2 (15.4)                           | 0 (0.0)                     |
| <b>Median age at initiation of ICI (range), yr</b>  | 61 (44-85)               | 62 (47-79)                         | 60 (44-85)                  |
| <b>Sex (%)</b>                                      |                          |                                    |                             |
| Male                                                | 20 (76.9)                | 9 (69.2)                           | 11 (84.6)                   |
| Female                                              | 6 (23.1)                 | 4 (30.8)                           | 2 (15.4)                    |
| <b>Stage at diagnosis (%)†</b>                      |                          |                                    |                             |
| I                                                   | 3 (16.7)                 | 2 (22.2)                           | 1 (11.1)                    |
| II                                                  | 1 (5.6)                  | 1 (11.1)                           | 0 (0.0)                     |
| III                                                 | 5 (27.8)                 | 2 (22.2)                           | 3 (33.3)                    |
| IV                                                  | 9 (50.0)                 | 4 (44.4)                           | 5 (55.6)                    |
| <b>Pathology†</b>                                   |                          |                                    |                             |
| Clear cell                                          | 17 (88.9)                | 8 (88.9)                           | 8 (88.9)                    |
| Papillary                                           | 1 (5.6)                  | 0 (0.0)                            | 1 (11.1)                    |
| Sarcomatoid                                         | 1 (5.6)                  | 1 (11.1)                           | 0 (0.0)                     |
| <b>IMDC risk group (%)†</b>                         |                          |                                    |                             |
| Favorable                                           | 3 (16.7)                 | 2 (22.2)                           | 1 (11.1)                    |
| Intermediate                                        | 9 (50.0)                 | 6 (66.7)                           | 3 (33.3)                    |
| Poor                                                | 6 (33.3)                 | 1 (11.1)                           | 5 (55.6)                    |
| <b>Previous therapies (%)†</b>                      |                          |                                    |                             |
| Nephrectomy                                         | 17 (94.4)                | 8 (88.9)                           | 9 (100.0)                   |
| Radiation                                           | 10 (55.6)                | 5 (55.6)                           | 5 (55.6)                    |
| Anti-angiogenic agent                               | 16 (88.9)                | 8 (88.9)                           | 8 (88.9)                    |
| mTOR inhibitor                                      | 7 (38.9)                 | 4 (44.4)                           | 4 (44.4)                    |
| High-dose IL-2                                      | 6 (33.3)                 | 2 (22.2)                           | 3 (33.3)                    |
| <b>ICI agent (%)</b>                                |                          |                                    |                             |
| Nivolumab                                           | 25 (96.2)                | 12 (92.3)                          | 13 (100.0)                  |
| Atezolizumab                                        | 1 (3.8)                  | 1 (7.7)                            | 0 (0.0)                     |
| <b>ICI line of therapy (%)†</b>                     |                          |                                    |                             |
| First-line                                          | 1 (5.6)                  | 1 (11.1)                           | 0 (0.0)                     |
| Second-line                                         | 3 (16.7)                 | 1 (11.1)                           | 2 (22.2)                    |
| Third-line                                          | 8 (44.4)                 | 4 (44.4)                           | 4 (44.4)                    |
| Fourth-line+                                        | 6 (33.3)                 | 3 (33.3)                           | 3 (33.3)                    |
| <b>Median duration of ICI therapy (range), days</b> | 123 (27-1637)            | 448 (27-1637)***                   | 73 (28-238)***              |
| <b>Median survival (95% CI), months</b>             |                          |                                    |                             |
| PFS                                                 | 4.03 (2.86-13.4)         | 13.4 (9.01-not reached)###         | 2.76 (2.33-not reached)###  |
| OS†                                                 | 22.4 (12.4-not reached)  | Not reached (25.1-not reached)#    | 10.6 (5.95-not reached)#    |
| <b>irAE while on ICI therapy (%)†</b>               | 5 (27.8)                 | 5 (55.6)                           | 0 (0.0)                     |

†Clinical characteristic available only for subset of patients

\*\*\*p&lt;0.001, two-tailed Mann-Whitney U test

#p&lt;0.05, ###p&lt;0.001, log-rank test

Abbreviations: CR, complete response; PR, partial response; PD, progression of disease; ICI, immune checkpoint inhibitor; IMDC: International Metastatic RCC Database Consortium; irAE, immune-related adverse event; CI, confidence interval; PFS, progression-free survival

**Table S3.** irAEs during ICI therapy in primary patient cohort

|                                  | Primary cohort, N = 94 | Responders, N = 38 | Non-responders, N = 56 |
|----------------------------------|------------------------|--------------------|------------------------|
| <b>irAE type (%)</b>             |                        |                    |                        |
| All                              | 35 (37.2)              | 19 (50.0)*         | 16 (28.6)*             |
| Thyroid dysfunction              | 12 (12.8)              | 6 (15.8)           | 6 (10.7)               |
| Dermatologic                     | 11 (11.7)              | 7 (18.4)           | 4 (7.1)                |
| Pneumonitis                      | 7 (7.4)                | 3 (7.9)            | 4 (7.1)                |
| Arthritis                        | 5 (5.3)                | 4 (10.5)           | 1 (1.8)                |
| Hepatitis                        | 5 (5.3)                | 5 (13.2)           | 0 (0.0)                |
| Colitis                          | 4 (4.3)                | 2 (5.3)            | 2 (3.6)                |
| Encephalitis                     | 3 (3.2)                | 2 (5.3)            | 1 (1.8)                |
| Nephritis                        | 2 (2.1)                | 2 (5.3)            | 0 (0.0)                |
| Hematologic                      | 2 (2.1)                | 1 (2.6)            | 1 (1.8)                |
| Myalgia                          | 2 (2.1)                | 1 (2.6)            | 1 (1.8)                |
| Hypophysitis                     | 1 (1.1)                | 1 (2.6)            | 0 (0.0)                |
| Diabetes mellitus                | 1 (1.1)                | 1 (2.6)            | 0 (0.0)                |
| Adrenal insufficiency            | 1 (1.1)                | 1 (2.6)            | 0 (0.0)                |
| Neuropathy                       | 1 (1.1)                | 1 (2.6)            | 0 (0.0)                |
| Arrhythmia                       | 1 (1.1)                | 1 (2.6)            | 0 (0.0)                |
| Other                            | 1 (1.1)                | 0 (0.0)            | 1 (1.8)                |
| <b>Patients with irAE</b>        | <b>n = 35</b>          | <b>n = 19</b>      | <b>n = 16</b>          |
| <b>irAE management (%)</b>       |                        |                    |                        |
| Immunosuppression                | 18 (51.4)              | 10 (52.6)          | 8 (50.0)               |
| Oral steroids                    | 17 (48.6)              | 10 (52.6)          | 7 (43.8)               |
| Intravenous steroids             | 6 (17.1)               | 2 (10.5)           | 4 (25.0)               |
| <b>Highest grade of irAE (%)</b> |                        |                    |                        |
| Grade 1                          | 11 (31.4)              | 6 (31.6)           | 5 (31.3)               |
| Grade 2                          | 16 (45.7)              | 8 (42.1)           | 8 (50.0)               |
| Grade 3                          | 7 (20.0)               | 4 (21.1)           | 3 (18.8)               |
| Grade 4                          | 1 (2.9)                | 1 (5.3)            | 0 (0.0)                |

\*p<0.05, OR = 2.50 (95% CI = 1.057 – 5.911), chi-square test

Abbreviations: irAE, immune-related adverse event

**Table S4.** Sites of metastasis prior to initiation of ICI in primary patient cohort

|                                | Primary cohort, N = 94 | Responders, N = 38 | Non-responders, N = 56 |
|--------------------------------|------------------------|--------------------|------------------------|
| <b>Sites of metastasis (%)</b> |                        |                    |                        |
| <b>All</b>                     | 90 (95.7)              | 36 (94.7)          | 54 (96.4)              |
| <b>Visceral</b>                | 84 (89.4)              | 33 (86.8)          | 51 (91.1)              |
| <b>Lung</b>                    | 67 (71.3)              | 29 (76.3)          | 38 (67.9)              |
| <b>Lymph node</b>              | 57 (60.1)              | 23 (60.5)          | 34 (60.7)              |
| <b>Bone</b>                    | 36 (38.3)              | 14 (36.8)          | 22 (39.3)              |
| <b>Adrenal</b>                 | 30 (31.9)              | 12 (31.6)          | 18 (32.1)              |
| <b>Liver</b>                   | 28 (29.8)              | 8 (21.1)           | 20 (35.7)              |
| <b>Soft tissue</b>             | 22 (23.4)              | 7 (18.4)           | 15 (26.8)              |
| <b>Pancreas</b>                | 17 (18.1)              | 3 (7.9)*           | 14 (25.0)*             |
| <b>Brain</b>                   | 12 (12.8)              | 4 (10.5)           | 8 (14.3)               |
| <b>Gastrointestinal</b>        | 5 (5.3)                | 2 (5.3)            | 3 (5.4)                |
| <b>Other</b>                   | 6 (6.4)                | 1 (2.6)            | 5 (8.9)                |

\*p&lt;0.05, OR = 0.257 (95% CI = 0.0683 – 0.968), chi-square test

**Table S5.** Selected differentially expressed pathways from gene set variation analysis

| Pathway                                                                   | Pathway type | Log <sub>e</sub> (ratio) | P-value  |
|---------------------------------------------------------------------------|--------------|--------------------------|----------|
| GO_KETOSTEROID_MONOOXYGENASE_ACTIVITY                                     | Metabolism   | -0.03933                 | 0.00019  |
| GO_BILE_ACID_BINDING                                                      | Metabolism   | 0.007758                 | 0.000194 |
| GSE6674_UNSTIM_VS_CPG_STIM_BCELL_DN                                       | Immune       | -0.04345                 | 0.001921 |
| GSE15659_CD45RA_NEG_CD4_TCELL_VS_ACTIVATED_TREG_UP                        | Immune       | 0.007549                 | 0.001928 |
| GO_COLLAGEN_BINDING_INVOLVED_IN_CELL_MATRIX_ADHESION                      | Metabolism   | -0.02938                 | 0.002564 |
| GSE32423_CTRL_VS_IL4_MEMORY_CD8_TCELL_UP                                  | Immune       | 0.003767                 | 0.003148 |
| GO_NEGATIVE_REGULATION_OF_SYNAPTIC_VESICLE_TRANSPORT                      | Metabolism   | 0.032617                 | 0.003375 |
| REACTOME_GLYCOGEN_BREAKDOWN_GLYCOGENOLYSIS                                | Metabolism   | -0.06214                 | 0.003438 |
| TONKS_TARGETS_OF_RUNX1_RUNX1T1_FUSION_GRANULOCYTE_UP                      | Immune       | 0.000645                 | 0.003607 |
| MORF_IFNA1                                                                | Immune       | 0.018098                 | 0.003761 |
| GO_MEDIUM_CHAIN_FATTY_ACID_COA_LIGASE_ACTIVITY                            | Metabolism   | -0.00155                 | 0.004061 |
| GSE21380_NON_TFH_VS_GERMINAL_CENTER_TFH_CD4_TCELL_UP                      | Immune       | 0.011311                 | 0.004099 |
| GSE3982_CTRL_VS_LPS_1H_NEUTROPHIL_DN                                      | Immune       | -0.01864                 | 0.004152 |
| GO_PYRUVATE_TRANSMEMBRANE_TRANSPORT                                       | Metabolism   | -0.01757                 | 0.004259 |
| GSE17974_IL4_AND_ANTI_IL12_VS_UNTREATED_4H_ACT_CD4_TCELL_UP               | Immune       | -0.03967                 | 0.004449 |
| GSE5589_LPS_VS_LPS_AND_IL10_STIM_MACROPHAGE_180MIN_UP                     | Immune       | -0.03487                 | 0.005379 |
| GO_ANTIGEN_PROCESSING_AND_PRESENTATION_OF_LIPID_ANTIGEN_VIA_MHC_CLASS_II  | Immune       | 0.043893                 | 0.00661  |
| REACTOME_SYNTHESIS_OF_BILE_ACIDS_AND_BILE_SALTS_VIA_24_HYDROXYCHOLESTEROL | Metabolism   | -0.00361                 | 0.006839 |
| GO_REGULATION_OF_DEFENSE_RESPONSE_TO_VIRUS                                | Immune       | -0.03198                 | 0.008726 |
| GSE26928_EFF_MEM_VS_CENTR_MEM_CD4_TCELL_DN                                | Immune       | -0.01357                 | 0.00939  |
| GO_POSITIVE_REGULATION_OF_DEFENSE_RESPONSE_TO_VIRUS_BY_HOST               | Immune       | -0.02478                 | 0.009429 |
| GSE15659_NONSUPPRESSIVE_TCELL_VS_ACTIVATED_TREG_UP                        | Immune       | 0.017029                 | 0.009708 |
